# Supplementary material for: The odor of a plant metabolite affects life history traits in dietary restricted adult olive flies
Source: PubMed Central journal article supplement (PMC4919778; doi:10.1038/srep28540), 2016-06-24
Supplement: srep28540-s1.pdf [file srep28540-s1.pdf]

**Submitted to:**

Scientific Reports

**The odor of a plant metabolite affects life history traits in dietary  
restricted adult olive flies**

Christos. D. Gerofotis,<sup>1</sup> Charalampos. S. Ioannou<sup>1</sup>, Christos. T. Nakas<sup>2,3</sup>, and  
Nikos. T. Papadopoulos<sup>1\*</sup>

<sup>1</sup>Laboratory of Entomology and Agricultural Zoology, Department of  
Agriculture Crop Production and Rural Environment, University of Thessaly,  
Phytokou St., 38446 N. Ionia Magnisia, Greece

<sup>2</sup>Laboratory of Biometry, Department of Agriculture Crop Production and Rural  
Environment, University of Thessaly, Phytokou St., 38446 N. Ionia Magnisia,  
Greece

<sup>3</sup>Inselspital - Bern University Hospital, Center of Laboratory Medicine,  
University Institute of Clinical Chemistry, ZLM INO F, Freiburgstrasse, 3010  
Bern, Switzerland

**Send correspondence to:**

Nikos Papadopoulos\*

Department of Agriculture, Crop Production and Rural Environment

Fytokou St., 38446 N. Ionia, Magnisia

Tel: +302421093285

Email: nikopap@uth.gr

Supplementary Figure 1. Event history diagrams

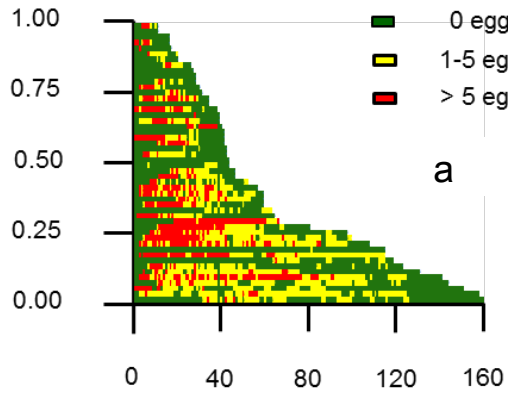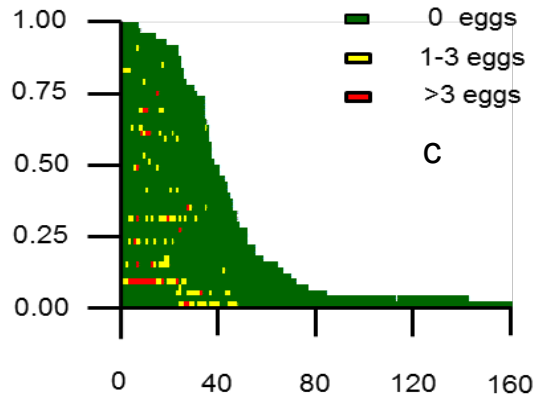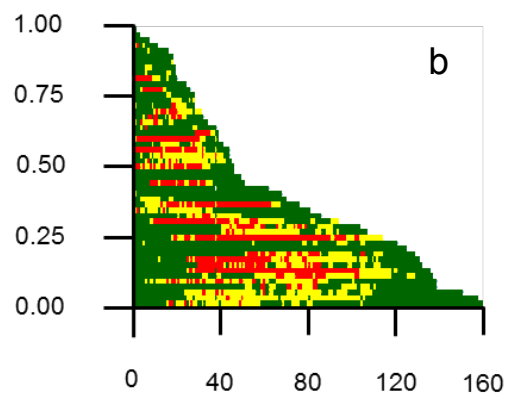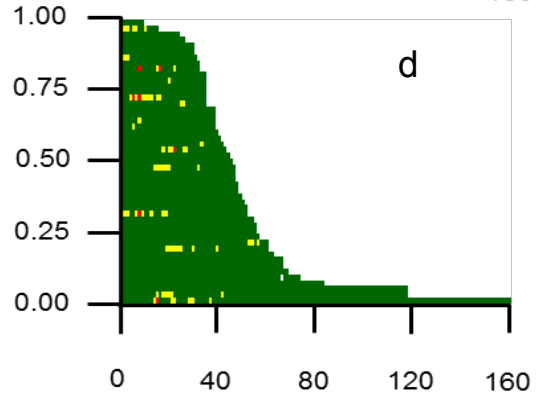

Supplementary Figure 2. Oviposition and post-oviposition periods

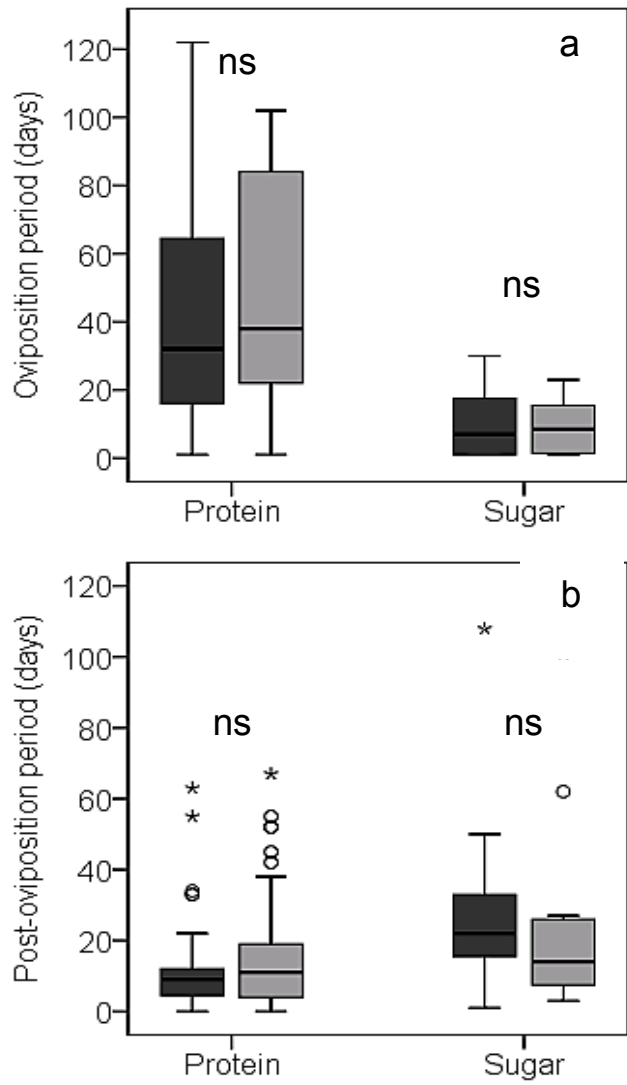

Supplementary Figure 3. Oviposition distribution

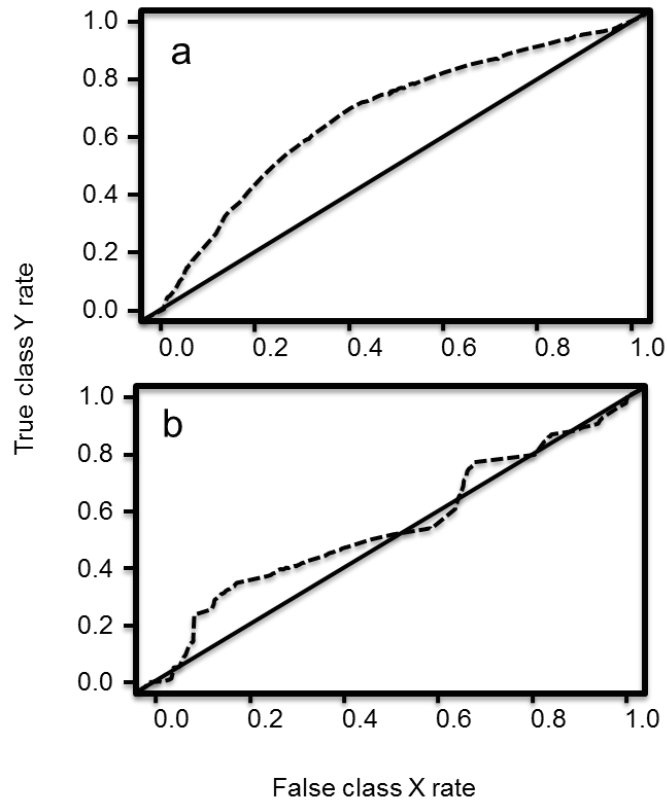

Figure 1S. Event history charts (Carey et al., 1998) for *Bactrocera oleae* females showing relationship of cohort survival and individual-level reproduction across treatments. Each horizontal line within a graph denotes a life line for an individual female, the length of which is proportional to her lifespan and with color-coded segments corresponding to age classes. The age-specific egg laying intensity for each individual female corresponds to the shading: green = zero eggs; yellow = 1–5eggs; red > 5 eggs for females fed in FD conditions (Fig a & b). Figure a represents exposed females to  $\alpha$ -pinene whereas Fig b non-exposed ones. For females feeding in DR conditions, color scale has been modified and represent different laying intensities, green = zero eggs; yellow = 1–3 eggs; red >3 eggs for females fed in sugar (Fig c & d). Figure c represents exposed females to  $\alpha$ -pinene whereas Fig d non-exposed ones.

Figure 2S. Box-plots representing oviposition (a) and post-oviposition (b) periods of females, exposed to the aroma of  $\alpha$ -pinene (black boxes) and non-exposed (grey boxes) in the respective food regimes.

Figure 3S. Effect of exposure to  $\alpha$ -pinene on age-specific fecundity. Receiver Operation Characteristics (ROC) analysis depicting the overlap of oviposition distribution between *Bactrocera oleae* females a) fed in FD conditions-exposed vs. non-exposed to  $\alpha$ -pinene (AUC = 0.67,  $P = 0.002$ ) and b) fed in DR conditions- exposed vs non-exposed to  $\alpha$ -pinene (AUC = 0.55,  $P = 0.62$ )
